# Supplementary material for: Genetic and molecular characterization of multicomponent resistance of Pseudomonas against allicin
Source: Life Sci Alliance. 2020 Mar 31;3(5):e202000670. doi: 10.26508/lsa.202000670 (PMC7119367; doi:10.26508/lsa.202000670)
Supplement: Supplementary file 6 [file LSA-2020-00670_TableS5.xlsx]

## Sheet: Table S5
Table S5: Primers used in this study, supplemental to materials and methods section.
Primer	sequence (5'->3')	amplicon	reference
P137	ACTGACGCGGCCGCTTATTTGAGCGATGCAACTGCGTC	hypothetical protein	this study
P138	ATATACTCTAGACGGTAAACATAGCCCACAGCGAAG	hypothetical protein	this study
P139	ACTGACGCGGCCGCTTAGCCCTCGATAACTTCGAGCTT	osmC	this study
P140	ATATACTCTAGAGCTTCGCTGTGGGCTATGTTTACC	osmC	this study
P141	ACTGACGCGGCCGCTTAGGCGCGTACAGCCATCACCCC	sdr	this study
P142	ATATACTCTAGAATTGTTGGTCGTCGGCGGCACAAG	sdr	this study
P143	ACTGACGCGGCCGCTTATCCTGCACGGAGGAGTGAAGA	tetR	this study
P144	ATATACTCTAGAGTGAGAAAGGGTGCTAGCTGTAGG	tetR	this study
P145	ACTGACGCGGCCGCTCAAATTTTGCAGCCATCGATGCC	dsbA	this study
P146	ATATACTCTAGAGCCGCAATGCAATCTTCACTCCTC	dsbA	this study
P147	ACTGACGCGGCCGCTTAGCTAGCATCTTCCAGCTCGGT	trx	this study
P148	ATATACTCTAGAGATAGCTCATTGATGGGCCAAGTC	trx	this study
P149	ACTGACGCGGCCGCTCAGCTCCCTGTATCTCTATGCGC	kefC	this study
P150	ATATACTCTAGACCGAAATTATGGCGAGCGCCTGACG	kefC	this study
P151	ACTGACGCGGCCGCTCAATCTTCCCTCCATGACGTCAG	kefF	this study
P152	ATATACTCTAGAGGCTTCTCCTTCAGGTCATTAG	kefF	this study
P153	ACTGACGCGGCCGCTTACTGGCCGGCTTGCAGCTTCAA	4-ot	this study
P154	ATATACTCTAGAAGCGGTTCGATTGATAAGGGCTAC	4-ot	this study
P155	ACTGACGCGGCCGCTCAGGCTTTGGCAGCTGCGTATTC	oye	this study
P156	ATATACTCTAGAGACGCGTTCGACAAGTCCTAAATC	oye	this study
P157	ACTGACGCGGCCGCTTAGGACTTGTCGAACGCGTCGAG	ahpD	this study
P158	ATATACTCTAGACTGCAGGGTGTTAAAGCCCACGTGAG	ahpD	this study
P159	ATATACGTGCACCCGGAATTGCCAGCTGGGGCGCCC	Neo prom.	this study
P160	ACTGACCTCGAGATATACCGATCGTAAACGGCTAGCTTGCAGGGCTTCCCAACCTTACCA	Neo prom.	this study
P161	ATATACCGATCGGAGCTCCACCGCGGTGGCGGCCGC	part of lacZ with MCS	this study
P162	ATATACGCTAGCGGTACCGGGCCCCCCCTCGAGGTC	part of lacZ with MCS	this study
P163	ACTGACGTGCACTATGCTTGTAAACCGTTTTGTGAA	pRU1097 backbone	this study
P164	ACTGACCTCGAGGCTCTACAAATAATGAATTCCCAG	pRU1097 backbone	this study
P183	GGCTGTGGCCGATCTAGGGCTGCA	pRU197 backbone -NotI	this study
P184	GCCGCAAACGTGGTCTGGTCGCGG	pRU197 backbone -NotI	this study
P195	CAGGCGTAGCACCAGGCGTTTAAG	sequening primer pJABO	this study
P213	ATATACCGATCGGAGCTCCACCGC	pRU1097 backbone -GFP	this study
P214	CAGGCATCAAATAAAACGAAAGGC	pRU1097 backbone .GFP	this study
P217	ACTGACGAGCTCCAGGCATCAAATAAAACGAAAGGC	rrnB1	this study
P220	ACTGACCGATCGATAAAACGAAAGGCCCAGTCTTTCGACT	rrnB1	this study
P323	ACTACGTCTAGACATATCATCCGCAGTGCTTG	1st primer for PfAR-1 gor	this study
P324	ACTATAGCGGCCGCTCAAGCAGAGCGTCGAGGAG	1st primer for PfAR-1 gor	this study
P426	TACTAAGCTGATCCGGTGGATGAC	sequencing primer pJABO	this study
P449	TACAAGCATAAAGCTTGCTCAATCAATCACCGGATAGTGCCACCTGAACGAAGCATCTGT	yeast 2µ & URA3 marker for pJABO5	this study
P488	AGGGTTAATTTCGAGCTTGGCGTAATCATGGTCATAGCTGTTTCCTGTGTGAAATTGTTA	lac promoter for pJABO5	this study
P489	TGTGAGCGGATAACAATTTCACACAGGAAACAGCTATGACCATGATTACGCCAAGCTCGA	lacZ fragment for pJABO5	this study
P490	GTTTTATTTGATGCCTGGGAATTCATTATTTGTAGTTACAATTTCCATTCGCCATTCAGG	lacZ fragment for pJABO5	this study
P491	CATGGGTGGAAGAGATGAAG	sequencing of pJABO5	this study
P506	AATGAGTGAGCTAACTCACATTAATTGCGTTGCGCCCTTACGCATCTGTGCGGTATTTCA	yeast 2µ & URA3 marker for pJABO5	this study
P507	CTATGCGGTGTGAAATACCGCACAGATGCGTAAGGGCGCAACGCAATTAATGTGAGTTAG	lac promoter for pJABO5	this study
P524	TGTGAGCGGATAACAATTTCACACAGGAAACAGCTATGGCCTACGATTTTGATCTTTATG	2nd nested primer for PfAR-1 gor	this study
P525	GTTTTATTTGATGCCTGGGAATTCATTATTTGTAGTTAAGCGCTGACCGGCGTACGCATG	2nd nested primer for PfAR-1 gor	this study
PAmpF	GTCAGAAGTAAGTTGGCCGCAGTG	part of ampR CDS	this study
PAmpfR	CATTTCCGTGTCGCCCTTATTCCC	part of ampR CDS	this study
PGentF	TCACCGTAATCTGCTTGCAC	part of gentR CDS	this study
PGentR	GGCTCAAGTATGGGCATCAT	part of gentR CDS	this study
PM13(-20)35S-Enh2	GTAAAACGACGGCCAGT	sequencing primer	this study
Preverse	GGAAACAGCTATGACCATG	sequencing primer	this study
